# Supplementary material
Source: publisher figshare collection journal article supplement (https://wiley.figshare.com/ndownloader/files/5637999)
Supplement: Supplementary file 1 [file 5637999]

OID	UTME	UTMN	HT
0	604293.435	3617150.562	3.00
1	604293.768	3617188.524	6.00
2	604293.768	3617176.536	4.00
3	604294.101	3617117.262	5.00
4	604294.101	3617116.263	4.00
5	604294.101	3617114.598	6.00
6	604294.101	3617099.613	3.00
7	604294.434	3617073.972	9.00
8	604294.767	3617190.522	7.00
9	604294.767	3617189.19	8.00
10	604294.767	3617176.869	6.00
11	604294.767	3617049.33	9.00
12	604294.767	3617047.332	9.00
13	604295.1	3617010.036	15.00
14	604295.433	3617178.534	5.00
15	604295.433	3617053.992	12.00
16	604295.433	3616999.38	10.00
17	604295.433	3616997.715	10.00
18	604295.433	3616994.385	7.00
19	604295.433	3616982.064	7.00
20	604295.766	3617128.917	4.00
21	604295.766	3617111.268	5.00
22	604295.766	3617108.604	5.00
23	604295.766	3617049.663	7.00
24	604295.766	3616987.725	12.00
25	604295.766	3616986.06	11.00
26	604295.766	3616984.062	12.00
27	604295.766	3616976.736	13.00
28	604295.766	3616967.412	7.00
29	604295.766	3616965.747	11.00
30	604295.766	3616956.423	12.00
31	604295.766	3616955.091	10.00
32	604295.766	3616942.77	7.00
33	604296.099	3617129.25	4.00
34	604296.099	3617060.652	5.00
35	604296.099	3617052.993	12.00
36	604296.099	3616989.723	13.00
37	604296.099	3616960.419	9.00
38	604296.099	3616947.765	5.00
39	604296.099	3616946.1	8.00
40	604296.099	3616938.108	6.00
41	604296.099	3616935.777	4.00
42	604296.099	3616934.778	4.00
43	604296.099	3616933.113	3.00
44	604296.099	3616931.448	3.00
45	604296.099	3616889.49	9.00
46	604296.432	3617109.603	5.00
47	604296.432	3617108.937	5.00
48	604296.432	3616973.073	10.00
49	604296.432	3616963.416	10.00
50	604296.432	3616953.759	10.00
51	604296.432	3616914.465	19.00
52	604296.432	3616908.138	3.00
53	604296.432	3616899.813	10.00
54	604296.432	3616896.15	8.00
55	604296.432	3616894.152	9.00
56	604296.432	3616890.489	3.00
57	604296.432	3616888.491	7.00
58	604296.765	3617162.217	3.00
59	604296.765	3616986.726	12.00
60	604296.765	3616985.061	11.00
61	604296.765	3616983.063	11.00
62	604296.765	3616873.506	14.00
63	604296.765	3616856.856	13.00
64	604296.765	3616854.858	13.00
65	604297.098	3617107.272	4.00
66	604297.098	3616991.721	10.00
67	604297.098	3616970.409	17.00
68	604297.098	3616962.417	12.00
69	604297.098	3616946.766	4.00
70	604297.098	3616860.519	17.00
71	604297.098	3616848.198	12.00
72	604297.098	3616845.201	8.00
73	604297.098	3616843.203	9.00
74	604297.098	3616841.538	10.00
75	604297.098	3616838.208	12.00
76	604297.098	3616836.543	12.00
77	604297.098	3616832.547	12.00
78	604297.098	3616831.215	10.00
79	604297.098	3616812.234	5.00
80	604297.431	3617163.216	3.00
81	604297.431	3617111.268	4.00
82	604297.431	3617108.604	5.00
83	604297.431	3616994.718	11.00
84	604297.431	3616980.066	12.00
85	604297.431	3616922.124	13.00
86	604297.431	3616852.86	13.00
87	604297.431	3616851.195	12.00
88	604297.431	3616817.562	3.00
89	604297.431	3616815.564	8.00
90	604297.431	3616793.586	11.00
91	604297.764	3617061.984	6.00
92	604297.764	3617060.319	5.00
93	604297.764	3616965.414	12.00
94	604297.764	3616957.089	12.00
95	604297.764	3616954.758	13.00
96	604297.764	3616951.095	9.00
97	604297.764	3616849.53	12.00
98	604297.764	3616839.873	12.00
99	604297.764	3616813.566	8.00
100	604297.764	3616781.931	12.00
101	604297.764	3616779.6	10.00
102	604297.764	3616771.941	7.00
103	604297.764	3616764.948	12.00
104	604297.764	3616763.616	11.00
105	604298.097	3617190.522	4.00
106	604298.097	3617107.938	4.00
107	604298.097	3617106.273	4.00
108	604298.097	3616981.731	14.00
109	604298.097	3616977.402	15.00
110	604298.097	3616963.416	10.00
111	604298.097	3616961.418	13.00
112	604298.097	3616898.481	6.00
113	604298.097	3616789.257	8.00
114	604298.097	3616762.284	10.00
115	604298.097	3616760.952	11.00
116	604298.097	3616755.957	12.00
117	604298.097	3616750.962	7.00
118	604298.097	3616749.297	13.00
119	604298.097	3616746.966	8.00
120	604298.097	3616734.312	12.00
121	604298.43	3617109.27	4.00
122	604298.43	3617105.94	4.00
123	604298.43	3616974.072	13.00
124	604298.43	3616953.426	10.00
125	604298.43	3616911.135	13.00
126	604298.43	3616847.865	13.00
127	604298.43	3616843.869	11.00
128	604298.43	3616837.542	13.00
129	604298.43	3616710.336	5.00
130	604298.43	3616699.68	6.00
131	604298.43	3616695.684	19.00
132	604298.763	3617130.915	11.00
133	604298.763	3617108.937	4.00
134	604298.763	3617088.957	14.00
135	604298.763	3616996.716	16.00
136	604298.763	3616984.728	15.00
137	604298.763	3616972.74	11.00
138	604298.763	3616968.411	10.00
139	604298.763	3616956.09	10.00
140	604298.763	3616814.232	4.00
141	604298.763	3616792.92	13.00
142	604298.763	3616785.261	11.00
143	604298.763	3616727.319	13.00
144	604298.763	3616707.672	6.00
145	604298.763	3616691.022	16.00
146	604298.763	3616689.024	17.00
147	604298.763	3616687.026	18.00
148	604298.763	3616682.364	18.00
149	604298.763	3616657.389	7.00
150	604298.763	3616654.725	11.00
151	604299.096	3617189.19	5.00
152	604299.096	3616994.052	10.00
153	604299.096	3616979.4	11.00
154	604299.096	3616921.791	16.00
155	604299.096	3616869.843	5.00
156	604299.096	3616851.528	13.00
157	604299.096	3616845.201	12.00
158	604299.096	3616836.21	12.00
159	604299.096	3616796.583	17.00
160	604299.096	3616772.607	8.00
161	604299.096	3616705.674	6.00
162	604299.096	3616643.736	5.00
163	604299.429	3617086.626	10.00
164	604299.429	3616999.713	9.00
165	604299.429	3616976.403	10.00
166	604299.429	3616954.758	11.00
167	604299.429	3616945.434	3.00
168	604299.429	3616886.16	8.00
169	604299.429	3616803.576	17.00
170	604299.429	3616794.252	9.00
171	604299.429	3616763.949	9.00
172	604299.429	3616750.962	8.00
173	604299.429	3616698.681	7.00
174	604299.429	3616693.02	12.00
175	604299.429	3616631.748	5.00
176	604299.429	3616630.083	4.00
177	604299.429	3616628.418	9.00
178	604299.429	3616626.087	7.00
179	604299.429	3616625.088	7.00
180	604299.429	3616619.76	8.00
181	604299.429	3616617.096	9.00
182	604299.429	3616605.774	6.00
183	604299.429	3616603.443	8.00
184	604299.429	3616602.111	10.00
185	604299.762	3617094.951	4.00
186	604299.762	3617005.041	6.00
187	604299.762	3616973.739	10.00
188	604299.762	3616969.077	11.00
189	604299.762	3616965.747	13.00
190	604299.762	3616958.754	12.00
191	604299.762	3616951.761	4.00
192	604299.762	3616917.462	21.00
193	604299.762	3616913.133	10.00
194	604299.762	3616891.155	15.00
195	604299.762	3616868.844	7.00
196	604299.762	3616855.857	11.00
197	604299.762	3616771.608	6.00
198	604299.762	3616704.675	5.00
199	604299.762	3616663.383	18.00
200	604299.762	3616654.059	9.00
201	604299.762	3616623.423	4.00
202	604299.762	3616593.453	7.00
203	604299.762	3616592.454	5.00
204	604299.762	3616585.461	3.00
205	604299.762	3616580.799	11.00
206	604299.762	3616577.802	14.00
207	604300.095	3616980.066	12.00
208	604300.095	3616953.093	5.00
209	604300.095	3616853.526	14.00
210	604300.095	3616839.873	13.00
211	604300.095	3616834.545	14.00
212	604300.095	3616783.263	10.00
213	604300.095	3616650.396	21.00
214	604300.095	3616587.126	11.00
215	604300.095	3616564.149	13.00
216	604300.428	3617094.285	3.00
217	604300.428	3616981.731	12.00
218	604300.428	3616866.513	13.00
219	604300.428	3616862.85	9.00
220	604300.428	3616837.875	13.00
221	604300.428	3616825.221	19.00
222	604300.428	3616811.568	8.00
223	604300.428	3616789.257	6.00
224	604300.428	3616757.622	13.00
225	604300.428	3616728.651	15.00
226	604300.428	3616706.34	6.00
227	604300.428	3616693.686	10.00
228	604300.428	3616680.033	23.00
229	604300.428	3616609.104	15.00
230	604300.428	3616598.448	9.00
231	604300.428	3616588.791	15.00
232	604300.428	3616556.49	9.00
233	604300.428	3616531.182	11.00
234	604300.428	3616526.853	16.00
235	604300.428	3616525.188	12.00
236	604300.428	3616521.858	16.00
237	604300.428	3616508.205	18.00
238	604300.761	3617003.043	8.00
239	604300.761	3616994.718	9.00
240	604300.761	3616966.746	13.00
241	604300.761	3616887.825	12.00
242	604300.761	3616870.842	7.00
243	604300.761	3616864.515	9.00
244	604300.761	3616847.532	7.00
245	604300.761	3616841.538	14.00
246	604300.761	3616784.262	11.00
247	604300.761	3616665.048	19.00
248	604300.761	3616633.08	6.00
249	604300.761	3616595.118	12.00
250	604300.761	3616590.456	14.00
251	604300.761	3616569.81	18.00
252	604300.761	3616549.497	9.00
253	604300.761	3616546.833	9.00
254	604300.761	3616545.501	10.00
255	604300.761	3616489.557	11.00
256	604300.761	3616486.56	8.00
257	604300.761	3616484.229	4.00
258	604300.761	3616483.23	5.00
259	604300.761	3616481.898	9.00
260	604300.761	3616478.235	6.00
261	604300.761	3616476.57	7.00
262	604301.094	3617128.584	11.00
263	604301.094	3616990.389	18.00
264	604301.094	3616964.415	9.00
265	604301.094	3616884.162	13.00
266	604301.094	3616878.501	18.00
267	604301.094	3616874.172	7.00
268	604301.094	3616861.185	14.00
269	604301.094	3616793.586	14.00
270	604301.094	3616772.94	6.00
271	604301.094	3616701.678	15.00
272	604301.094	3616628.751	10.00
273	604301.094	3616626.087	8.00
274	604301.094	3616593.12	8.00
275	604301.094	3616574.805	3.00
276	604301.094	3616561.818	13.00
277	604301.094	3616484.562	4.00
278	604301.094	3616467.246	8.00
279	604301.094	3616460.586	14.00
280	604301.094	3616453.926	22.00
281	604301.094	3616447.599	13.00
282	604301.094	3616445.934	12.00
283	604301.427	3617190.189	12.00
284	604301.427	3616984.395	12.00
285	604301.427	3616973.073	12.00
286	604301.427	3616957.089	5.00
287	604301.427	3616945.101	5.00
288	604301.427	3616893.486	10.00
289	604301.427	3616882.164	18.00
290	604301.427	3616876.17	13.00
291	604301.427	3616867.845	13.00
292	604301.427	3616854.192	12.00
293	604301.427	3616851.861	7.00
294	604301.427	3616810.902	11.00
295	604301.427	3616804.575	19.00
296	604301.427	3616718.328	29.00
297	604301.427	3616698.015	6.00
298	604301.427	3616689.69	18.00
299	604301.427	3616627.752	10.00
300	604301.427	3616615.098	10.00
301	604301.427	3616612.101	12.00
302	604301.427	3616599.447	11.00
303	604301.427	3616565.148	7.00
304	604301.427	3616563.483	8.00
305	604301.427	3616554.825	10.00
306	604301.427	3616553.493	10.00
307	604301.427	3616435.944	14.00
308	604301.76	3616970.076	10.00
309	604301.76	3616968.411	12.00
310	604301.76	3616960.752	7.00
311	604301.76	3616932.114	21.00
312	604301.76	3616894.485	9.00
313	604301.76	3616869.51	8.00
314	604301.76	3616839.207	12.00
315	604301.76	3616797.915	13.00
316	604301.76	3616773.273	6.00
317	604301.76	3616693.686	7.00
318	604301.76	3616666.713	16.00
319	604301.76	3616658.055	7.00
320	604301.76	3616629.75	9.00
321	604301.76	3616596.783	7.00
322	604301.76	3616580.466	14.00
323	604301.76	3616566.147	6.00
324	604301.76	3616514.199	18.00
325	604301.76	3616449.597	10.00
326	604301.76	3616425.621	17.00
327	604301.76	3616401.312	7.00
328	604301.76	3616399.647	9.00
329	604301.76	3616395.651	5.00
330	604301.76	3616387.326	15.00
331	604301.76	3616375.671	7.00
332	604301.76	3616367.679	14.00
333	604302.093	3616981.065	10.00
334	604302.093	3616978.401	11.00
335	604302.093	3616975.071	16.00
336	604302.093	3616959.42	3.00
337	604302.093	3616955.091	5.00
338	604302.093	3616926.453	19.00
339	604302.093	3616749.963	6.00
340	604302.093	3616726.653	12.00
341	604302.093	3616653.726	15.00
342	604302.093	3616591.788	4.00
343	604302.093	3616583.463	15.00
344	604302.093	3616546.833	7.00
345	604302.093	3616525.188	10.00
346	604302.093	3616502.544	17.00
347	604302.093	3616488.891	14.00
348	604302.093	3616472.241	15.00
349	604302.093	3616439.607	5.00
350	604302.093	3616416.963	10.00
351	604302.093	3616380.666	15.00
352	604302.093	3616374.672	6.00
353	604302.093	3616369.677	6.00
354	604302.093	3616363.35	9.00
355	604302.426	3617055.99	3.00
356	604302.426	3617047.332	11.00
357	604302.426	3617006.706	11.00
358	604302.426	3616972.074	12.00
359	604302.426	3616959.087	4.00
360	604302.426	3616957.422	4.00
361	604302.426	3616929.45	18.00
362	604302.426	3616922.79	15.00
363	604302.426	3616915.797	12.00
364	604302.426	3616890.489	12.00
365	604302.426	3616866.513	13.00
366	604302.426	3616863.516	12.00
367	604302.426	3616841.205	9.00
368	604302.426	3616783.596	14.00
369	604302.426	3616772.607	7.00
370	604302.426	3616729.317	12.00
371	604302.426	3616700.013	14.00
372	604302.426	3616694.685	7.00
373	604302.426	3616628.751	10.00
374	604302.426	3616589.79	9.00
375	604302.426	3616559.82	11.00
376	604302.426	3616477.236	10.00
377	604302.426	3616467.912	8.00
378	604302.426	3616448.265	10.00
379	604302.426	3616431.615	7.00
380	604302.426	3616419.96	6.00
381	604302.426	3616409.97	14.00
382	604302.426	3616383.996	8.00
383	604302.426	3616341.705	17.00
384	604302.426	3616336.71	15.00
385	604302.426	3616331.049	13.00
386	604302.426	3616312.734	13.00
387	604302.759	3617130.249	9.00
388	604302.759	3617057.655	4.00
389	604302.759	3616960.419	6.00
390	604302.759	3616958.421	4.00
391	604302.759	3616876.836	12.00
392	604302.759	3616857.855	10.00
393	604302.759	3616856.523	5.00
394	604302.759	3616850.196	7.00
395	604302.759	3616846.533	14.00
396	604302.759	3616829.55	7.00
397	604302.759	3616799.913	13.00
398	604302.759	3616640.739	8.00
399	604302.759	3616572.474	12.00
400	604302.759	3616563.816	6.00
401	604302.759	3616555.158	13.00
402	604302.759	3616550.496	9.00
403	604302.759	3616496.55	18.00
404	604302.759	3616487.559	13.00
405	604302.759	3616484.895	4.00
406	604302.759	3616405.641	10.00
407	604302.759	3616392.987	11.00
408	604302.759	3616388.991	14.00
409	604302.759	3616364.349	5.00
410	604302.759	3616362.684	9.00
411	604302.759	3616353.027	18.00
412	604302.759	3616344.036	13.00
413	604302.759	3616310.736	15.00
414	604302.759	3616281.765	6.00
415	604303.092	3617069.31	10.00
416	604303.092	3617056.989	4.00
417	604303.092	3616942.437	12.00
418	604303.092	3616916.796	11.00
419	604303.092	3616913.799	11.00
420	604303.092	3616861.185	12.00
421	604303.092	3616842.204	10.00
422	604303.092	3616836.21	18.00
423	604303.092	3616805.574	17.00
424	604303.092	3616771.941	9.00
425	604303.092	3616670.709	4.00
426	604303.092	3616562.151	9.00
427	604303.092	3616549.497	9.00
428	604303.092	3616492.554	22.00
429	604303.092	3616480.233	14.00
430	604303.092	3616478.235	10.00
431	604303.092	3616462.584	23.00
432	604303.092	3616379.001	14.00
433	604303.092	3616373.34	6.00
434	604303.092	3616348.365	12.00
435	604303.092	3616332.714	13.00
436	604303.092	3616326.387	11.00
437	604303.092	3616257.123	4.00
438	604303.425	3617045.667	7.00
439	604303.425	3617003.376	13.00
440	604303.425	3617000.712	8.00
441	604303.425	3616995.717	6.00
442	604303.425	3616883.829	14.00
443	604303.425	3616874.505	17.00
444	604303.425	3616811.568	8.00
445	604303.425	3616803.243	15.00
446	604303.425	3616756.956	8.00
447	604303.425	3616724.655	13.00
448	604303.425	3616707.339	9.00
449	604303.425	3616675.704	4.00
450	604303.425	3616656.723	5.00
451	604303.425	3616652.394	13.00
452	604303.425	3616644.735	15.00
453	604303.425	3616627.086	7.00
454	604303.425	3616621.425	13.00
455	604303.425	3616616.763	10.00
456	604303.425	3616585.128	15.00
457	604303.425	3616560.819	11.00
458	604303.425	3616544.502	10.00
459	604303.425	3616524.189	12.00
460	604303.425	3616467.246	10.00
461	604303.425	3616437.609	7.00
462	604303.425	3616382.664	9.00
463	604303.425	3616365.348	7.00
464	604303.425	3616363.35	8.00
465	604303.425	3616308.072	9.00
466	604303.425	3616292.088	13.00
467	604303.425	3616276.104	6.00
468	604303.425	3616266.114	11.00
469	604303.425	3616264.116	9.00
470	604303.425	3616238.475	6.00
471	604303.425	3616237.476	8.00
472	604303.425	3616233.813	11.00
473	604303.758	3617149.563	13.00
474	604303.758	3617147.565	10.00
475	604303.758	3617129.25	9.00
476	604303.758	3617083.629	4.00
477	604303.758	3617082.297	3.00
478	604303.758	3617005.707	10.00
479	604303.758	3616967.079	14.00
480	604303.758	3616964.082	16.00
481	604303.758	3616943.436	9.00
482	604303.758	3616933.446	5.00
483	604303.758	3616909.47	3.00
484	604303.758	3616877.835	14.00
485	604303.758	3616830.882	13.00
486	604303.758	3616821.891	8.00
487	604303.758	3616787.925	19.00
488	604303.758	3616726.986	13.00
489	604303.758	3616639.407	9.00
490	604303.758	3616600.779	4.00
491	604303.758	3616588.791	13.00
492	604303.758	3616574.139	15.00
493	604303.758	3616568.811	10.00
494	604303.758	3616557.156	9.00
495	604303.758	3616431.948	4.00
496	604303.758	3616423.623	16.00
497	604303.758	3616387.326	15.00
498	604303.758	3616380.999	14.00
499	604303.758	3616375.005	4.00
500	604303.758	3616372.674	7.00
501	604303.758	3616366.68	4.00
502	604303.758	3616340.373	14.00
503	604303.758	3616327.386	12.00
504	604303.758	3616290.09	7.00
505	604303.758	3616231.149	15.00
506	604303.758	3616228.485	16.00
507	604303.758	3616204.176	7.00
508	604303.758	3616202.178	5.00
509	604303.758	3616199.847	5.00
510	604303.758	3616198.848	7.00
511	604303.758	3616190.856	15.00
512	604303.758	3616189.191	16.00
513	604304.091	3617068.311	9.00
514	604304.091	3616939.107	10.00
515	604304.091	3616925.121	11.00
516	604304.091	3616914.798	11.00
517	604304.091	3616892.154	11.00
518	604304.091	3616850.196	6.00
519	604304.091	3616839.873	14.00
520	604304.091	3616838.208	15.00
521	604304.091	3616833.546	25.00
522	604304.091	3616809.903	9.00
523	604304.091	3616774.272	4.00
524	604304.091	3616697.682	11.00
525	604304.091	3616694.685	10.00
526	604304.091	3616674.039	6.00
527	604304.091	3616654.392	5.00
528	604304.091	3616612.767	16.00
529	604304.091	3616593.453	9.00
530	604304.091	3616570.143	10.00
531	604304.091	3616554.492	13.00
532	604304.091	3616548.165	11.00
533	604304.091	3616538.841	14.00
534	604304.091	3616522.857	11.00
535	604304.091	3616520.859	5.00
536	604304.091	3616516.53	19.00
537	604304.091	3616488.891	16.00
538	604304.091	3616484.895	4.00
539	604304.091	3616450.596	7.00
540	604304.091	3616426.62	9.00
541	604304.091	3616417.629	12.00
542	604304.091	3616383.663	7.00
543	604304.091	3616356.024	18.00
544	604304.091	3616343.037	10.00
545	604304.091	3616334.379	13.00
546	604304.091	3616316.73	12.00
547	604304.091	3616306.74	10.00
548	604304.091	3616273.773	9.00
549	604304.091	3616272.441	11.00
550	604304.091	3616255.791	12.00
551	604304.091	3616226.487	15.00
552	604304.091	3616181.199	5.00
553	604304.091	3616179.867	4.00
554	604304.091	3616177.536	7.00
555	604304.091	3616176.204	7.00
556	604304.091	3616174.206	10.00
557	604304.091	3616172.874	9.00
558	604304.091	3616160.886	10.00
559	604304.091	3616156.557	11.00
560	604304.091	3616154.892	15.00
561	604304.091	3616143.237	4.00
562	604304.424	3617145.9	12.00
563	604304.424	3617070.309	4.00
564	604304.424	3616909.803	3.00
565	604304.424	3616859.853	12.00
566	604304.424	3616848.864	4.00
567	604304.424	3616826.22	17.00
568	604304.424	3616781.265	13.00
569	604304.424	3616773.939	4.00
570	604304.424	3616700.346	16.00
571	604304.424	3616512.867	12.00
572	604304.424	3616414.965	14.00
573	604304.424	3616332.048	13.00
574	604304.424	3616313.4	13.00
575	604304.424	3616305.741	10.00
576	604304.424	3616289.091	9.00
577	604304.424	3616239.474	10.00
578	604304.424	3616186.194	5.00
579	604304.424	3616151.562	10.00
580	604304.424	3616146.9	10.00
581	604304.424	3616110.27	4.00
582	604304.757	3617088.291	11.00
583	604304.757	3617008.704	7.00
584	604304.757	3616998.714	5.00
585	604304.757	3616986.06	6.00
586	604304.757	3616920.459	8.00
587	604304.757	3616917.129	11.00
588	604304.757	3616912.134	7.00
589	604304.757	3616910.136	3.00
590	604304.757	3616878.834	12.00
591	604304.757	3616867.845	8.00
592	604304.757	3616863.516	13.00
593	604304.757	3616849.197	4.00
594	604304.757	3616846.866	14.00
595	604304.757	3616798.914	18.00
596	604304.757	3616746.633	5.00
597	604304.757	3616690.356	14.00
598	604304.757	3616675.371	9.00
599	604304.757	3616543.503	11.00
600	604304.757	3616507.206	5.00
601	604304.757	3616503.543	13.00
602	604304.757	3616470.576	7.00
603	604304.757	3616456.923	16.00
604	604304.757	3616448.931	7.00
605	604304.757	3616416.63	10.00
606	604304.757	3616409.97	23.00
607	604304.757	3616405.641	12.00
608	604304.757	3616399.98	4.00
609	604304.757	3616373.007	9.00
610	604304.757	3616370.343	9.00
611	604304.757	3616361.685	4.00
612	604304.757	3616350.03	8.00
613	604304.757	3616336.377	12.00
614	604304.757	3616319.061	10.00
615	604304.757	3616311.402	15.00
616	604304.757	3616299.081	4.00
617	604304.757	3616261.452	12.00
618	604304.757	3616259.787	9.00
619	604304.757	3616258.122	3.00
620	604304.757	3616253.793	14.00
621	604304.757	3616251.129	11.00
622	604304.757	3616242.471	11.00
623	604304.757	3616232.814	11.00
624	604304.757	3616131.915	9.00
625	604304.757	3616119.261	7.00
626	604304.757	3616116.597	15.00
627	604304.757	3616107.606	14.00
628	604304.757	3616092.288	10.00
629	604305.09	3617045.334	4.00
630	604305.09	3617006.04	8.00
631	604305.09	3616980.399	17.00
632	604305.09	3616910.802	5.00
633	604305.09	3616884.495	11.00
634	604305.09	3616861.185	12.00
635	604305.09	3616843.536	9.00
636	604305.09	3616822.557	12.00
637	604305.09	3616777.935	9.00
638	604305.09	3616758.954	9.00
639	604305.09	3616755.291	11.00
640	604305.09	3616655.391	5.00
641	604305.09	3616608.105	18.00
642	604305.09	3616599.447	11.00
643	604305.09	3616584.462	11.00
644	604305.09	3616559.154	5.00
645	604305.09	3616546.167	14.00
646	604305.09	3616542.171	4.00
647	604305.09	3616521.858	12.00
648	604305.09	3616518.861	12.00
649	604305.09	3616472.907	6.00
650	604305.09	3616467.912	5.00
651	604305.09	3616425.954	11.00
652	604305.09	3616391.322	16.00
653	604305.09	3616339.707	11.00
654	604305.09	3616325.055	7.00
655	604305.09	3616285.428	15.00
656	604305.09	3616248.132	9.00
657	604305.09	3616221.492	12.00
658	604305.09	3616219.827	15.00
659	604305.09	3616198.182	7.00
660	604305.09	3616170.543	12.00
661	604305.09	3616167.879	15.00
662	604305.09	3616144.236	7.00
663	604305.09	3616090.956	8.00
664	604305.09	3616086.627	16.00
665	604305.09	3616084.296	14.00
666	604305.09	3616077.636	21.00
667	604305.09	3616066.314	15.00
668	604305.09	3616057.323	15.00
669	604305.423	3617110.269	13.00
670	604305.423	3617023.356	14.00
671	604305.423	3617002.044	9.00
672	604305.423	3617000.712	11.00
673	604305.423	3616993.386	6.00
674	604305.423	3616937.775	12.00
675	604305.423	3616881.831	16.00
676	604305.423	3616849.863	5.00
677	604305.423	3616806.906	15.00
678	604305.423	3616775.271	4.00
679	604305.423	3616771.941	8.00
680	604305.423	3616759.953	7.00
681	604305.423	3616676.37	7.00
682	604305.423	3616654.392	9.00
683	604305.423	3616648.065	8.00
684	604305.423	3616574.805	12.00
685	604305.423	3616573.473	9.00
686	604305.423	3616568.145	7.00
687	604305.423	3616565.481	7.00
688	604305.423	3616560.819	9.00
689	604305.423	3616549.83	10.00
690	604305.423	3616523.523	9.00
691	604305.423	3616478.568	7.00
692	604305.423	3616475.238	7.00
693	604305.423	3616383.663	8.00
694	604305.423	3616381.998	10.00
695	604305.423	3616376.337	7.00
696	604305.423	3616309.737	12.00
697	604305.423	3616294.086	12.00
698	604305.423	3616292.421	11.00
699	604305.423	3616263.783	8.00
700	604305.423	3616256.79	8.00
701	604305.423	3616243.803	7.00
702	604305.423	3616238.475	11.00
703	604305.423	3616215.165	6.00
704	604305.423	3616212.834	7.00
705	604305.423	3616196.184	9.00
706	604305.423	3616159.221	12.00
707	604305.423	3616082.298	11.00
708	604305.423	3616068.312	10.00
709	604305.423	3616055.658	14.00
710	604305.423	3616045.668	13.00
711	604305.423	3616043.67	12.00
712	604305.423	3616025.355	3.00
713	604305.423	3616018.362	6.00
714	604305.756	3617150.562	18.00
715	604305.756	3617129.916	10.00
716	604305.756	3617032.347	8.00
717	604305.756	3616978.734	17.00
718	604305.756	3616935.444	12.00
719	604305.756	3616925.787	15.00
720	604305.756	3616918.794	9.00
721	604305.756	3616886.826	5.00
722	604305.756	3616811.235	5.00
723	604305.756	3616785.261	15.00
724	604305.756	3616778.601	9.00
725	604305.756	3616752.96	5.00
726	604305.756	3616694.685	12.00
727	604305.756	3616673.373	9.00
728	604305.756	3616652.061	7.00
729	604305.756	3616597.116	12.00
730	604305.756	3616572.474	9.00
731	604305.756	3616525.854	14.00
732	604305.756	3616520.193	9.00
733	604305.756	3616502.544	7.00
734	604305.756	3616487.226	13.00
735	604305.756	3616476.237	10.00
736	604305.756	3616441.938	7.00
737	604305.756	3616432.947	13.00
738	604305.756	3616419.294	8.00
739	604305.756	3616372.008	11.00
740	604305.756	3616353.36	17.00
741	604305.756	3616328.385	3.00
742	604305.756	3616306.74	9.00
743	604305.756	3616273.107	14.00
744	604305.756	3616271.109	6.00
745	604305.756	3616268.778	10.00
746	604305.756	3616229.484	13.00
747	604305.756	3616224.822	13.00
748	604305.756	3616171.875	12.00
749	604305.756	3616150.896	7.00
750	604305.756	3616147.566	14.00
751	604305.756	3616144.569	6.00
752	604305.756	3616090.29	8.00
753	604305.756	3616000.38	3.00
754	604306.089	3617087.958	13.00
755	604306.089	3617007.372	8.00
756	604306.089	3616997.382	4.00
757	604306.089	3616996.383	9.00
758	604306.089	3616989.723	11.00
759	604306.089	3616887.825	4.00
760	604306.089	3616865.847	15.00
761	604306.089	3616858.854	12.00
762	604306.089	3616855.191	13.00
763	604306.089	3616853.193	12.00
764	604306.089	3616842.87	9.00
765	604306.089	3616711.335	18.00
766	604306.089	3616708.338	15.00
767	604306.089	3616703.01	15.00
768	604306.089	3616691.688	4.00
769	604306.089	3616685.361	16.00
770	604306.089	3616658.388	11.00
771	604306.089	3616641.738	16.00
772	604306.089	3616627.752	4.00
773	604306.089	3616604.109	11.00
774	604306.089	3616593.12	10.00
775	604306.089	3616571.475	8.00
776	604306.089	3616569.81	11.00
777	604306.089	3616551.162	11.00
778	604306.089	3616474.905	6.00
779	604306.089	3616466.247	8.00
780	604306.089	3616449.264	7.00
781	604306.089	3616445.934	13.00
782	604306.089	3616377.003	8.00
783	604306.089	3616374.006	9.00
784	604306.089	3616369.011	9.00
785	604306.089	3616337.376	14.00
786	604306.089	3616213.833	7.00
787	604306.089	3616194.186	11.00
788	604306.089	3616169.877	12.00
789	604306.089	3616165.215	16.00
790	604306.089	3616142.238	9.00
791	604306.089	3616140.906	8.00
792	604306.089	3616108.605	11.00
793	604306.089	3616098.615	30.00
794	604306.089	3616072.641	18.00
795	604306.089	3616051.662	17.00
796	604306.089	3616049.664	14.00
797	604306.089	3615968.745	16.00
798	604306.422	3617066.313	4.00
799	604306.422	3617005.041	10.00
800	604306.422	3616994.385	8.00
801	604306.422	3616991.055	10.00
802	604306.422	3616976.403	9.00
803	604306.422	3616971.408	20.00
804	604306.422	3616929.783	5.00
805	604306.422	3616850.862	6.00
806	604306.422	3616844.868	5.00
807	604306.422	3616838.208	17.00
808	604306.422	3616821.225	14.00
809	604306.422	3616800.246	15.00
810	604306.422	3616776.936	6.00
811	604306.422	3616757.955	11.00
812	604306.422	3616731.648	15.00
813	604306.422	3616714.665	6.00
814	604306.422	3616675.038	11.00
815	604306.422	3616663.05	13.00
816	604306.422	3616647.399	10.00
817	604306.422	3616594.785	11.00
818	604306.422	3616587.126	4.00
819	604306.422	3616585.794	4.00
820	604306.422	3616581.132	3.00
821	604306.422	3616545.168	9.00
822	604306.422	3616521.525	11.00
823	604306.422	3616452.927	9.00
824	604306.422	3616427.619	8.00
825	604306.422	3616380	11.00
826	604306.422	3616370.343	12.00
827	604306.422	3616355.358	16.00
828	604306.422	3616349.697	11.00
829	604306.422	3616344.036	17.00
830	604306.422	3616263.117	10.00
831	604306.422	3616239.807	12.00
832	604306.422	3616187.193	8.00
833	604306.422	3616185.528	7.00
834	604306.422	3616152.228	8.00
835	604306.422	3616127.586	25.00
836	604306.422	3616080.966	11.00
837	604306.422	3616060.986	9.00
838	604306.422	3615983.064	5.00
839	604306.422	3615972.075	23.00
840	604306.422	3615955.758	5.00
841	604306.755	3617096.283	13.00
842	604306.755	3617047.998	5.00
843	604306.755	3617035.011	6.00
844	604306.755	3617001.378	10.00
845	604306.755	3616986.393	6.00
846	604306.755	3616981.731	17.00
847	604306.755	3616957.089	4.00
848	604306.755	3616928.118	8.00
849	604306.755	3616921.791	7.00
850	604306.755	3616915.464	6.00
851	604306.755	3616895.151	6.00
852	604306.755	3616879.5	7.00
853	604306.755	3616863.183	12.00
854	604306.755	3616841.205	13.00
855	604306.755	3616808.238	13.00
856	604306.755	3616779.6	11.00
857	604306.755	3616688.691	15.00
858	604306.755	3616661.052	15.00
859	604306.755	3616596.117	12.00
860	604306.755	3616566.813	6.00
861	604306.755	3616564.482	9.00
862	604306.755	3616559.487	4.00
863	604306.755	3616538.175	10.00
864	604306.755	3616519.527	3.00
865	604306.755	3616387.326	8.00
866	604306.755	3616362.018	5.00
867	604306.755	3616333.713	8.00
868	604306.755	3616328.052	6.00
869	604306.755	3616318.062	11.00
870	604306.755	3616315.398	10.00
871	604306.755	3616311.402	9.00
872	604306.755	3616308.738	14.00
873	604306.755	3616288.758	9.00
874	604306.755	3616241.472	13.00
875	604306.755	3616230.483	10.00
876	604306.755	3616174.539	5.00
877	604306.755	3616158.888	10.00
878	604306.755	3616120.593	7.00
879	604306.755	3616106.274	12.00
880	604306.755	3616102.611	19.00
881	604306.755	3616063.317	10.00
882	604306.755	3616010.703	3.00
883	604306.755	3615936.111	17.00
884	604306.755	3615919.461	9.00
885	604306.755	3615917.463	9.00
886	604306.755	3615908.805	18.00
887	604306.755	3615902.811	5.00
888	604307.088	3617108.937	9.00
889	604307.088	3617046.666	9.00
890	604307.088	3617039.673	13.00
891	604307.088	3616966.413	13.00
892	604307.088	3616908.804	9.00
893	604307.088	3616826.553	22.00
894	604307.088	3616824.222	20.00
895	604307.088	3616764.615	5.00
896	604307.088	3616681.365	19.00
897	604307.088	3616676.037	8.00
898	604307.088	3616628.418	6.00
899	604307.088	3616592.121	7.00
900	604307.088	3616559.154	3.00
901	604307.088	3616544.169	6.00
902	604307.088	3616478.235	10.00
903	604307.088	3616466.913	8.00
904	604307.088	3616463.583	10.00
905	604307.088	3616441.938	6.00
906	604307.088	3616335.045	7.00
907	604307.088	3616303.077	9.00
908	604307.088	3616290.09	8.00
909	604307.088	3616260.786	11.00
910	604307.088	3616259.121	7.00
911	604307.088	3616256.79	5.00
912	604307.088	3616254.459	10.00
913	604307.088	3616253.127	10.00
914	604307.088	3616214.832	6.00
915	604307.088	3616200.513	14.00
916	604307.088	3616193.52	9.00
917	604307.088	3616160.553	13.00
918	604307.088	3616156.224	10.00
919	604307.088	3616116.264	10.00
920	604307.088	3616109.604	9.00
921	604307.088	3616085.628	16.00
922	604307.088	3616056.324	9.00
923	604307.088	3615927.786	10.00
924	604307.088	3615924.456	10.00
925	604307.088	3615891.489	5.00
926	604307.088	3615889.824	4.00
927	604307.088	3615887.826	5.00
928	604307.088	3615876.837	16.00
929	604307.088	3615873.84	12.00
930	604307.088	3615871.509	5.00
931	604307.088	3615870.177	4.00
932	604307.088	3615868.845	4.00
933	604307.421	3617037.342	8.00
934	604307.421	3617025.354	14.00
935	604307.421	3616997.382	7.00
936	604307.421	3616995.717	5.00
937	604307.421	3616977.069	11.00
938	604307.421	3616969.41	14.00
939	604307.421	3616931.115	7.00
940	604307.421	3616885.494	6.00
941	604307.421	3616830.216	21.00
942	604307.421	3616774.272	10.00
943	604307.421	3616757.289	12.00
944	604307.421	3616739.973	9.00
945	604307.421	3616728.318	4.00
946	604307.421	3616643.403	13.00
947	604307.421	3616588.791	4.00
948	604307.421	3616565.814	12.00
949	604307.421	3616562.484	13.00
950	604307.421	3616547.832	7.00
951	604307.421	3616546.167	5.00
952	604307.421	3616499.214	19.00
953	604307.421	3616490.889	10.00
954	604307.421	3616473.906	9.00
955	604307.421	3616454.592	14.00
956	604307.421	3616449.264	7.00
957	604307.421	3616421.958	15.00
958	604307.421	3616399.314	11.00
959	604307.421	3616369.677	10.00
960	604307.421	3616360.686	3.00
961	604307.421	3616331.382	11.00
962	604307.421	3616310.07	12.00
963	604307.421	3616285.428	10.00
964	604307.421	3616236.81	5.00
965	604307.421	3616212.834	8.00
966	604307.421	3616211.169	3.00
967	604307.421	3616196.184	12.00
968	604307.421	3616157.556	10.00
969	604307.421	3616151.562	7.00
970	604307.421	3616107.273	12.00
971	604307.421	3616092.288	19.00
972	604307.421	3616077.636	16.00
973	604307.421	3616057.656	6.00
974	604307.421	3615883.497	4.00
975	604307.421	3615865.182	13.00
976	604307.421	3615860.52	5.00
977	604307.421	3615857.856	8.00
978	604307.421	3615845.202	13.00
979	604307.421	3615831.882	22.00
980	604307.754	3617068.977	9.00
981	604307.754	3616876.503	8.00
982	604307.754	3616853.193	13.00
983	604307.754	3616797.249	22.00
984	604307.754	3616789.923	8.00
985	604307.754	3616736.31	11.00
986	604307.754	3616703.01	14.00
987	604307.754	3616699.347	24.00
988	604307.754	3616684.362	18.00
989	604307.754	3616673.373	7.00
990	604307.754	3616649.064	10.00
991	604307.754	3616645.401	10.00
992	604307.754	3616640.739	15.00
993	604307.754	3616612.101	8.00
994	604307.754	3616607.106	17.00
995	604307.754	3616586.793	5.00
996	604307.754	3616523.523	15.00
997	604307.754	3616513.2	15.00
998	604307.754	3616488.558	13.00
999	604307.754	3616485.561	11.00
1000	604307.754	3616477.236	11.00
1001	604307.754	3616470.243	7.00
1002	604307.754	3616451.262	10.00
1003	604307.754	3616416.963	7.00
1004	604307.754	3616378.335	8.00
1005	604307.754	3616374.006	8.00
1006	604307.754	3616365.015	11.00
1007	604307.754	3616359.021	14.00
1008	604307.754	3616329.717	12.00
1009	604307.754	3616316.064	10.00
1010	604307.754	3616312.401	11.00
1011	604307.754	3616268.778	10.00
1012	604307.754	3616255.791	8.00
1013	604307.754	3616226.487	5.00
1014	604307.754	3616194.852	11.00
1015	604307.754	3616132.581	13.00
1016	604307.754	3616131.249	13.00
1017	604307.754	3616081.965	12.00
1018	604307.754	3616052.328	14.00
1019	604307.754	3616002.378	4.00
1020	604307.754	3615915.132	16.00
1021	604307.754	3615894.486	15.00
1022	604307.754	3615888.825	6.00
1023	604307.754	3615885.495	15.00
1024	604307.754	3615842.205	19.00
1025	604307.754	3615835.878	17.00
1026	604307.754	3615821.892	25.00
1027	604307.754	3615815.565	16.00
1028	604307.754	3615810.57	8.00
1029	604308.087	3617150.895	15.00
1030	604308.087	3617047.332	10.00
1031	604308.087	3617038.341	11.00
1032	604308.087	3617036.343	8.00
1033	604308.087	3617001.378	13.00
1034	604308.087	3616935.777	9.00
1035	604308.087	3616934.445	8.00
1036	604308.087	3616931.781	7.00
1037	604308.087	3616866.846	8.00
1038	604308.087	3616781.931	4.00
1039	604308.087	3616778.934	10.00
1040	604308.087	3616771.275	9.00
1041	604308.087	3616756.29	11.00
1042	604308.087	3616745.967	12.00
1043	604308.087	3616637.409	15.00
1044	604308.087	3616627.419	10.00
1045	604308.087	3616623.756	7.00
1046	604308.087	3616584.462	5.00
1047	604308.087	3616567.812	10.00
1048	604308.087	3616547.166	3.00
1049	604308.087	3616540.506	9.00
1050	604308.087	3616538.508	11.00
1051	604308.087	3616533.513	12.00
1052	604308.087	3616497.216	21.00
1053	604308.087	3616468.911	10.00
1054	604308.087	3616464.249	11.00
1055	604308.087	3616459.587	12.00
1056	604308.087	3616444.602	9.00
1057	604308.087	3616426.62	7.00
1058	604308.087	3616425.288	8.00
1059	604308.087	3616385.994	9.00
1060	604308.087	3616375.338	8.00
1061	604308.087	3616372.341	10.00
1062	604308.087	3616345.368	17.00
1063	604308.087	3616291.089	9.00
1064	604308.087	3616283.763	7.00
1065	604308.087	3616271.442	7.00
1066	604308.087	3616263.117	7.00
1067	604308.087	3616258.455	6.00
1068	604308.087	3616214.499	5.00
1069	604308.087	3616205.175	6.00
1070	604308.087	3616198.182	7.00
1071	604308.087	3616156.557	9.00
1072	604308.087	3616155.225	7.00
1073	604308.087	3616141.905	6.00
1074	604308.087	3616117.929	10.00
1075	604308.087	3616067.979	13.00
1076	604308.087	3616064.316	13.00
1077	604308.087	3616047.333	13.00
1078	604308.087	3615921.792	16.00
1079	604308.087	3615920.127	8.00
1080	604308.087	3615898.482	13.00
1081	604308.087	3615859.188	9.00
1082	604308.087	3615808.239	15.00
1083	604308.42	3617027.685	14.00
1084	604308.42	3617005.374	10.00
1085	604308.42	3616865.181	9.00
1086	604308.42	3616841.538	13.00
1087	604308.42	3616809.237	10.00
1088	604308.42	3616775.271	8.00
1089	604308.42	3616773.606	6.00
1090	604308.42	3616753.626	15.00
1091	604308.42	3616715.664	5.00
1092	604308.42	3616696.017	22.00
1093	604308.42	3616679.367	18.00
1094	604308.42	3616654.725	16.00
1095	604308.42	3616599.114	7.00
1096	604308.42	3616588.791	3.00
1097	604308.42	3616564.815	11.00
1098	604308.42	3616545.501	6.00
1099	604308.42	3616515.531	18.00
1100	604308.42	3616478.901	10.00
1101	604308.42	3616457.922	13.00
1102	604308.42	3616452.261	11.00
1103	604308.42	3616447.266	10.00
1104	604308.42	3616433.613	16.00
1105	604308.42	3616400.646	16.00
1106	604308.42	3616387.992	9.00
1107	604308.42	3616353.027	17.00
1108	604308.42	3616340.706	7.00
1109	604308.42	3616333.38	11.00
1110	604308.42	3616322.391	7.00
1111	604308.42	3616300.746	11.00
1112	604308.42	3616282.098	7.00
1113	604308.42	3616278.768	9.00
1114	604308.42	3616205.841	5.00
1115	604308.42	3616174.539	13.00
1116	604308.42	3616163.217	16.00
1117	604308.42	3616152.228	8.00
1118	604308.42	3616108.605	12.00
1119	604308.42	3616072.641	15.00
1120	604308.42	3616054.992	10.00
1121	604308.42	3616002.711	4.00
1122	604308.42	3615981.399	5.00
1123	604308.42	3615957.09	15.00
1124	604308.42	3615937.776	15.00
1125	604308.42	3615861.186	5.00
1126	604308.753	3617046.333	9.00
1127	604308.753	3617044.668	8.00
1128	604308.753	3617031.348	14.00
1129	604308.753	3617021.691	11.00
1130	604308.753	3616998.714	10.00
1131	604308.753	3616993.053	11.00
1132	604308.753	3616989.723	15.00
1133	604308.753	3616987.725	12.00
1134	604308.753	3616910.469	7.00
1135	604308.753	3616868.511	13.00
1136	604308.753	3616851.195	10.00
1137	604308.753	3616843.869	8.00
1138	604308.753	3616742.304	8.00
1139	604308.753	3616693.353	19.00
1140	604308.753	3616668.711	25.00
1141	604308.753	3616664.049	6.00
1142	604308.753	3616589.79	4.00
1143	604308.753	3616536.51	13.00
1144	604308.753	3616534.845	13.00
1145	604308.753	3616510.203	19.00
1146	604308.753	3616473.906	8.00
1147	604308.753	3616430.949	11.00
1148	604308.753	3616397.649	17.00
1149	604308.753	3616336.044	8.00
1150	604308.753	3616335.045	8.00
1151	604308.753	3616289.091	7.00
1152	604308.753	3616286.76	11.00
1153	604308.753	3616283.097	7.00
1154	604308.753	3616220.16	3.00
1155	604308.753	3616204.176	8.00
1156	604308.753	3616197.516	8.00
1157	604308.753	3616189.524	10.00
1158	604308.753	3616144.902	4.00
1159	604308.753	3616143.237	6.00
1160	604308.753	3616120.926	9.00
1161	604308.753	3616114.932	10.00
1162	604308.753	3616112.934	18.00
1163	604308.753	3616049.331	17.00
1164	604308.753	3615870.177	3.00
1165	604308.753	3615864.183	15.00
1166	604308.753	3615858.522	6.00
1167	604308.753	3615854.526	4.00
1168	604309.086	3617157.555	9.00
1169	604309.086	3617047.665	8.00
1170	604309.086	3617002.377	14.00
1171	604309.086	3616985.727	5.00
1172	604309.086	3616972.74	13.00
1173	604309.086	3616886.826	9.00
1174	604309.086	3616862.85	7.00
1175	604309.086	3616861.518	11.00
1176	604309.086	3616858.854	14.00
1177	604309.086	3616848.531	7.00
1178	604309.086	3616835.877	21.00
1179	604309.086	3616832.214	14.00
1180	604309.086	3616804.242	17.00
1181	604309.086	3616784.595	10.00
1182	604309.086	3616757.289	8.00
1183	604309.086	3616722.99	8.00
1184	604309.086	3616715.997	7.00
1185	604309.086	3616690.689	7.00
1186	604309.086	3616688.025	15.00
1187	604309.086	3616646.067	4.00
1188	604309.086	3616626.087	13.00
1189	604309.086	3616573.806	5.00
1190	604309.086	3616558.155	6.00
1191	604309.086	3616530.849	17.00
1192	604309.086	3616525.188	8.00
1193	604309.086	3616491.555	13.00
1194	604309.086	3616470.243	10.00
1195	604309.086	3616390.989	13.00
1196	604309.086	3616382.997	7.00
1197	604309.086	3616330.05	13.00
1198	604309.086	3616311.069	10.00
1199	604309.086	3616294.419	7.00
1200	604309.086	3616284.429	9.00
1201	604309.086	3616243.137	10.00
1202	604309.086	3616235.478	11.00
1203	604309.086	3616188.525	9.00
1204	604309.086	3616157.223	9.00
1205	604309.086	3616081.632	13.00
1206	604309.086	3615944.436	12.00
1207	604309.086	3615925.455	22.00
1208	604309.086	3615905.142	3.00
1209	604309.086	3615847.866	21.00
1210	604309.086	3615838.209	22.00
1211	604309.086	3615819.561	20.00
1212	604309.419	3617037.675	10.00
1213	604309.419	3616849.863	9.00
1214	604309.419	3616814.232	9.00
1215	604309.419	3616758.288	8.00
1216	604309.419	3616674.705	8.00
1217	604309.419	3616642.071	14.00
1218	604309.419	3616613.766	6.00
1219	604309.419	3616570.476	10.00
1220	604309.419	3616560.486	9.00
1221	604309.419	3616523.523	9.00
1222	604309.419	3616485.561	8.00
1223	604309.419	3616467.912	12.00
1224	604309.419	3616465.914	14.00
1225	604309.419	3616445.268	9.00
1226	604309.419	3616387.326	10.00
1227	604309.419	3616373.34	11.00
1228	604309.419	3616368.345	8.00
1229	604309.419	3616365.015	13.00
1230	604309.419	3616317.729	9.00
1231	604309.419	3616296.75	9.00
1232	604309.419	3616269.444	6.00
1233	604309.419	3616262.118	14.00
1234	604309.419	3616241.472	10.00
1235	604309.419	3616178.868	9.00
1236	604309.419	3616150.896	9.00
1237	604309.419	3616141.239	6.00
1238	604309.419	3616118.928	10.00
1239	604309.419	3616117.596	12.00
1240	604309.419	3616106.94	11.00
1241	604309.419	3616093.62	23.00
1242	604309.419	3616061.319	17.00
1243	604309.419	3615915.132	13.00
1244	604309.419	3615817.23	19.00
1245	604309.752	3617112.267	11.00
1246	604309.752	3617109.936	7.00
1247	604309.752	3617096.949	3.00
1248	604309.752	3617096.616	3.00
1249	604309.752	3617005.041	8.00
1250	604309.752	3617001.045	11.00
1251	604309.752	3616999.713	11.00
1252	604309.752	3616980.732	17.00
1253	604309.752	3616914.465	13.00
1254	604309.752	3616909.137	4.00
1255	604309.752	3616881.498	5.00
1256	604309.752	3616775.937	7.00
1257	604309.752	3616703.01	11.00
1258	604309.752	3616569.144	11.00
1259	604309.752	3616563.15	13.00
1260	604309.752	3616506.207	21.00
1261	604309.752	3616501.212	16.00
1262	604309.752	3616487.892	9.00
1263	604309.752	3616480.899	11.00
1264	604309.752	3616478.568	11.00
1265	604309.752	3616462.251	10.00
1266	604309.752	3616452.927	11.00
1267	604309.752	3616416.963	10.00
1268	604309.752	3616414.632	11.00
1269	604309.752	3616382.331	9.00
1270	604309.752	3616380.333	12.00
1271	604309.752	3616358.022	17.00
1272	604309.752	3616331.382	14.00
1273	604309.752	3616327.386	12.00
1274	604309.752	3616314.066	15.00
1275	604309.752	3616280.1	8.00
1276	604309.752	3616276.437	12.00
1277	604309.752	3616268.112	6.00
1278	604309.752	3616260.453	13.00
1279	604309.752	3616220.826	4.00
1280	604309.752	3616183.863	13.00
1281	604309.752	3616160.22	9.00
1282	604309.752	3616158.555	11.00
1283	604309.752	3616155.891	7.00
1284	604309.752	3616119.927	10.00
1285	604309.752	3616116.264	9.00
1286	604309.752	3616075.305	12.00
1287	604309.752	3616054.992	8.00
1288	604309.752	3616004.043	4.00
1289	604309.752	3615917.13	4.00
1290	604309.752	3615912.135	7.00
1291	604309.752	3615910.803	9.00
1292	604309.752	3615898.149	6.00
1293	604309.752	3615868.179	4.00
1294	604309.752	3615865.515	11.00
1295	604310.085	3617157.888	8.00
1296	604310.085	3617152.227	14.00
1297	604310.085	3617149.563	14.00
1298	604310.085	3617041.005	15.00
1299	604310.085	3616997.382	7.00
1300	604310.085	3616992.387	11.00
1301	604310.085	3616942.437	5.00
1302	604310.085	3616902.144	6.00
1303	604310.085	3616868.844	13.00
1304	604310.085	3616850.862	9.00
1305	604310.085	3616840.872	13.00
1306	604310.085	3616828.884	19.00
1307	604310.085	3616789.59	13.00
1308	604310.085	3616783.263	8.00
1309	604310.085	3616782.264	6.00
1310	604310.085	3616778.934	13.00
1311	604310.085	3616774.272	7.00
1312	604310.085	3616648.398	10.00
1313	604310.085	3616635.078	10.00
1314	604310.085	3616630.083	12.00
1315	604310.085	3616603.776	4.00
1316	604310.085	3616586.793	8.00
1317	604310.085	3616571.475	12.00
1318	604310.085	3616542.171	6.00
1319	604310.085	3616525.854	9.00
1320	604310.085	3616522.191	11.00
1321	604310.085	3616471.908	7.00
1322	604310.085	3616470.576	8.00
1323	604310.085	3616438.275	10.00
1324	604310.085	3616404.309	12.00
1325	604310.085	3616377.669	8.00
1326	604310.085	3616211.502	6.00
1327	604310.085	3616172.541	14.00
1328	604310.085	3616152.228	8.00
1329	604310.085	3616141.905	5.00
1330	604310.085	3616083.63	15.00
1331	604310.085	3616004.376	3.00
1332	604310.085	3615917.463	4.00
1333	604310.085	3615893.82	7.00
1334	604310.085	3615867.18	7.00
1335	604310.418	3617136.243	10.00
1336	604310.418	3617114.931	7.00
1337	604310.418	3617030.349	11.00
1338	604310.418	3616994.718	12.00
1339	604310.418	3616988.058	12.00
1340	604310.418	3616954.092	13.00
1341	604310.418	3616923.789	3.00
1342	604310.418	3616893.819	8.00
1343	604310.418	3616877.502	18.00
1344	604310.418	3616864.182	7.00
1345	604310.418	3616862.85	12.00
1346	604310.418	3616794.252	19.00
1347	604310.418	3616743.636	11.00
1348	604310.418	3616739.973	13.00
1349	604310.418	3616732.647	21.00
1350	604310.418	3616727.652	3.00
1351	604310.418	3616704.009	11.00
1352	604310.418	3616701.345	16.00
1353	604310.418	3616633.413	9.00
1354	604310.418	3616558.821	8.00
1355	604310.418	3616550.496	7.00
1356	604310.418	3616524.522	6.00
1357	604310.418	3616513.2	17.00
1358	604310.418	3616449.264	14.00
1359	604310.418	3616435.278	15.00
1360	604310.418	3616430.616	13.00
1361	604310.418	3616399.314	18.00
1362	604310.418	3616370.676	16.00
1363	604310.418	3616366.68	8.00
1364	604310.418	3616334.379	9.00
1365	604310.418	3616326.387	12.00
1366	604310.418	3616302.078	10.00
1367	604310.418	3616244.136	7.00
1368	604310.418	3616215.831	9.00
1369	604310.418	3616198.848	8.00
1370	604310.418	3616077.303	9.00
1371	604310.418	3616004.709	4.00
1372	604310.418	3615963.084	33.00
1373	604310.418	3615941.106	17.00
1374	604310.418	3615892.488	11.00
1375	604310.751	3617159.22	5.00
1376	604310.751	3617150.895	14.00
1377	604310.751	3617112.933	12.00
1378	604310.751	3617037.675	9.00
1379	604310.751	3617026.353	16.00
1380	604310.751	3617000.379	12.00
1381	604310.751	3616931.781	6.00
1382	604310.751	3616892.487	9.00
1383	604310.751	3616879.5	13.00
1384	604310.751	3616851.528	9.00
1385	604310.751	3616849.53	9.00
1386	604310.751	3616808.904	13.00
1387	604310.751	3616695.684	16.00
1388	604310.751	3616690.023	11.00
1389	604310.751	3616661.385	21.00
1390	604310.751	3616640.073	13.00
1391	604310.751	3616566.813	14.00
1392	604310.751	3616564.149	12.00
1393	604310.751	3616552.494	8.00
1394	604310.751	3616534.512	15.00
1395	604310.751	3616531.515	13.00
1396	604310.751	3616468.911	8.00
1397	604310.751	3616462.917	12.00
1398	604310.751	3616457.922	14.00
1399	604310.751	3616455.258	11.00
1400	604310.751	3616421.292	8.00
1401	604310.751	3616373.007	11.00
1402	604310.751	3616323.723	8.00
1403	604310.751	3616300.746	8.00
1404	604310.751	3616298.415	9.00
1405	604310.751	3616284.762	8.00
1406	604310.751	3616281.432	8.00
1407	604310.751	3616239.807	13.00
1408	604310.751	3616235.811	14.00
1409	604310.751	3616231.482	6.00
1410	604310.751	3616188.858	5.00
1411	604310.751	3616127.919	14.00
1412	604310.751	3616123.59	19.00
1413	604310.751	3616112.934	19.00
1414	604310.751	3616101.945	10.00
1415	604310.751	3616063.317	5.00
1416	604310.751	3616049.331	15.00
1417	604310.751	3615945.435	16.00
1418	604310.751	3615933.78	17.00
1419	604310.751	3615911.802	6.00
1420	604310.751	3615891.156	8.00
1421	604310.751	3615863.184	7.00
1422	604310.751	3615857.523	21.00
1423	604311.084	3617109.27	9.00
1424	604311.084	3617063.649	3.00
1425	604311.084	3616959.087	12.00
1426	604311.084	3616951.095	10.00
1427	604311.084	3616914.465	13.00
1428	604311.084	3616873.506	13.00
1429	604311.084	3616848.531	8.00
1430	604311.084	3616847.532	8.00
1431	604311.084	3616814.232	11.00
1432	604311.084	3616748.964	10.00
1433	604311.084	3616735.311	18.00
1434	604311.084	3616730.649	19.00
1435	604311.084	3616724.988	3.00
1436	604311.084	3616705.674	9.00
1437	604311.084	3616676.703	6.00
1438	604311.084	3616594.452	10.00
1439	604311.084	3616576.137	8.00
1440	604311.084	3616532.847	13.00
1441	604311.084	3616493.886	17.00
1442	604311.084	3616460.586	11.00
1443	604311.084	3616447.266	12.00
1444	604311.084	3616389.324	7.00
1445	604311.084	3616375.338	7.00
1446	604311.084	3616313.067	11.00
1447	604311.084	3616291.089	9.00
1448	604311.084	3616287.759	10.00
1449	604311.084	3616286.427	9.00
1450	604311.084	3616282.764	7.00
1451	604311.084	3616207.506	7.00
1452	604311.084	3616159.221	11.00
1453	604311.084	3616150.23	11.00
1454	604311.084	3616143.237	5.00
1455	604311.084	3616131.582	5.00
1456	604311.084	3616106.607	5.00
1457	604311.084	3616054.326	12.00
1458	604311.084	3615929.784	6.00
1459	604311.084	3615915.465	12.00
1460	604311.084	3615876.171	3.00
1461	604311.084	3615866.514	10.00
1462	604311.417	3617170.209	9.00
1463	604311.417	3617148.231	15.00
1464	604311.417	3617103.609	13.00
1465	604311.417	3617049.663	20.00
1466	604311.417	3616990.389	13.00
1467	604311.417	3616962.75	13.00
1468	604311.417	3616957.422	14.00
1469	604311.417	3616938.441	11.00
1470	604311.417	3616916.13	11.00
1471	604311.417	3616903.809	9.00
1472	604311.417	3616893.486	8.00
1473	604311.417	3616806.24	15.00
1474	604311.417	3616742.637	11.00
1475	604311.417	3616724.655	3.00
1476	604311.417	3616597.116	8.00
1477	604311.417	3616574.805	9.00
1478	604311.417	3616560.486	7.00
1479	604311.417	3616452.927	12.00
1480	604311.417	3616383.33	16.00
1481	604311.417	3616377.336	7.00
1482	604311.417	3616352.028	7.00
1483	604311.417	3616350.696	8.00
1484	604311.417	3616318.062	8.00
1485	604311.417	3616315.398	11.00
1486	604311.417	3616300.08	7.00
1487	604311.417	3616294.086	4.00
1488	604311.417	3616275.438	10.00
1489	604311.417	3616191.855	4.00
1490	604311.417	3616180.2	14.00
1491	604311.417	3616153.893	9.00
1492	604311.417	3616039.674	4.00
1493	604311.417	3615913.467	11.00
1494	604311.417	3615891.822	6.00
1495	604311.417	3615889.491	11.00
1496	604311.417	3615887.826	12.00
1497	604311.417	3615861.852	8.00
1498	604311.417	3615819.894	18.00
1499	604311.417	3615813.9	21.00
1500	604311.75	3617168.877	7.00
1501	604311.75	3617152.56	15.00
1502	604311.75	3617107.605	7.00
1503	604311.75	3617028.351	14.00
1504	604311.75	3616924.455	3.00
1505	604311.75	3616901.145	3.00
1506	604311.75	3616892.154	10.00
1507	604311.75	3616857.855	11.00
1508	604311.75	3616826.553	12.00
1509	604311.75	3616811.568	15.00
1510	604311.75	3616727.319	5.00
1511	604311.75	3616724.655	3.00
1512	604311.75	3616724.322	3.00
1513	604311.75	3616676.037	7.00
1514	604311.75	3616601.778	8.00
1515	604311.75	3616563.483	11.00
1516	604311.75	3616555.158	8.00
1517	604311.75	3616540.506	9.00
1518	604311.75	3616498.215	12.00
1519	604311.75	3616475.904	14.00
1520	604311.75	3616465.248	11.00
1521	604311.75	3616444.602	4.00
1522	604311.75	3616424.955	6.00
1523	604311.75	3616417.629	6.00
1524	604311.75	3616406.973	17.00
1525	604311.75	3616387.992	11.00
1526	604311.75	3616334.379	8.00
1527	604311.75	3616311.069	10.00
1528	604311.75	3616237.476	15.00
1529	604311.75	3616228.485	6.00
1530	604311.75	3616205.175	8.00
1531	604311.75	3616203.843	8.00
1532	604311.75	3616163.55	14.00
1533	604311.75	3616149.231	10.00
1534	604311.75	3616140.573	4.00
1535	604311.75	3616109.271	12.00
1536	604311.75	3615966.414	3.00
1537	604311.75	3615892.488	6.00
1538	604311.75	3615874.173	8.00
1539	604311.75	3615852.861	24.00
1540	604311.75	3615832.215	20.00
1541	604311.75	3615816.564	20.00
1542	604312.083	3617062.983	11.00
1543	604312.083	3616999.713	13.00
1544	604312.083	3616940.106	13.00
1545	604312.083	3616937.109	12.00
1546	604312.083	3616934.778	12.00
1547	604312.083	3616865.181	9.00
1548	604312.083	3616853.193	11.00
1549	604312.083	3616850.196	8.00
1550	604312.083	3616830.549	9.00
1551	604312.083	3616781.598	11.00
1552	604312.083	3616747.299	14.00
1553	604312.083	3616707.006	8.00
1554	604312.083	3616644.069	18.00
1555	604312.083	3616638.075	18.00
1556	604312.083	3616604.442	7.00
1557	604312.083	3616565.481	12.00
1558	604312.083	3616561.818	10.00
1559	604312.083	3616551.828	10.00
1560	604312.083	3616529.517	16.00
1561	604312.083	3616524.189	10.00
1562	604312.083	3616467.579	8.00
1563	604312.083	3616433.28	16.00
1564	604312.083	3616428.285	12.00
1565	604312.083	3616379.334	9.00
1566	604312.083	3616349.031	10.00
1567	604312.083	3616343.037	22.00
1568	604312.083	3616297.416	9.00
1569	604312.083	3616293.087	6.00
1570	604312.083	3616291.755	8.00
1571	604312.083	3616266.114	6.00
1572	604312.083	3616262.784	11.00
1573	604312.083	3616243.137	6.00
1574	604312.083	3616239.807	7.00
1575	604312.083	3616211.169	7.00
1576	604312.083	3616143.57	4.00
1577	604312.083	3616126.254	16.00
1578	604312.083	3616089.624	17.00
1579	604312.083	3616056.324	18.00
1580	604312.083	3615974.406	23.00
1581	604312.083	3615956.091	15.00
1582	604312.083	3615938.109	18.00
1583	604312.083	3615927.786	11.00
1584	604312.083	3615890.49	8.00
1585	604312.416	3617156.223	6.00
1586	604312.416	3617149.563	14.00
1587	604312.416	3617107.938	7.00
1588	604312.416	3617061.651	7.00
1589	604312.416	3617035.011	9.00
1590	604312.416	3617017.362	3.00
1591	604312.416	3616995.717	7.00
1592	604312.416	3616965.081	17.00
1593	604312.416	3616959.087	13.00
1594	604312.416	3616956.423	13.00
1595	604312.416	3616941.771	12.00
1596	604312.416	3616909.47	9.00
1597	604312.416	3616891.155	10.00
1598	604312.416	3616888.824	12.00
1599	604312.416	3616880.166	9.00
1600	604312.416	3616871.841	16.00
1601	604312.416	3616856.523	10.00
1602	604312.416	3616840.539	17.00
1603	604312.416	3616838.208	14.00
1604	604312.416	3616814.898	8.00
1605	604312.416	3616807.905	16.00
1606	604312.416	3616801.911	3.00
1607	604312.416	3616750.962	11.00
1608	604312.416	3616673.373	14.00
1609	604312.416	3616592.787	15.00
1610	604312.416	3616559.82	8.00
1611	604312.416	3616558.155	8.00
1612	604312.416	3616537.509	12.00
1613	604312.416	3616519.194	17.00
1614	604312.416	3616483.23	6.00
1615	604312.416	3616424.289	5.00
1616	604312.416	3616390.323	7.00
1617	604312.416	3616389.324	7.00
1618	604312.416	3616376.004	10.00
1619	604312.416	3616333.047	10.00
1620	604312.416	3616317.396	8.00
1621	604312.416	3616271.109	6.00
1622	604312.416	3616241.472	8.00
1623	604312.416	3616209.504	10.00
1624	604312.416	3616201.845	12.00
1625	604312.416	3616200.18	13.00
1626	604312.416	3616192.854	5.00
1627	604312.416	3616159.554	13.00
1628	604312.416	3616143.237	4.00
1629	604312.416	3616141.239	6.00
1630	604312.416	3616085.961	17.00
1631	604312.416	3615871.176	21.00
1632	604312.416	3615842.871	26.00
1633	604312.416	3615824.223	28.00
1634	604312.416	3615811.569	17.00
1635	604312.749	3617169.543	12.00
1636	604312.749	3617168.211	12.00
1637	604312.749	3617025.354	17.00
1638	604312.749	3616993.053	12.00
1639	604312.749	3616920.792	3.00
1640	604312.749	3616915.464	10.00
1641	604312.749	3616887.159	12.00
1642	604312.749	3616877.502	9.00
1643	604312.749	3616816.563	11.00
1644	604312.749	3616813.233	12.00
1645	604312.749	3616786.926	9.00
1646	604312.749	3616737.975	6.00
1647	604312.749	3616696.683	10.00
1648	604312.749	3616675.704	9.00
1649	604312.749	3616642.071	19.00
1650	604312.749	3616634.745	15.00
1651	604312.749	3616595.451	11.00
1652	604312.749	3616523.19	8.00
1653	604312.749	3616491.222	15.00
1654	604312.749	3616455.258	7.00
1655	604312.749	3616377.669	10.00
1656	604312.749	3616375.005	9.00
1657	604312.749	3616328.718	11.00
1658	604312.749	3616314.066	11.00
1659	604312.749	3616309.737	10.00
1660	604312.749	3616287.759	13.00
1661	604312.749	3616255.458	8.00
1662	604312.749	3616227.486	5.00
1663	604312.749	3616152.894	15.00
1664	604312.749	3616144.236	4.00
1665	604312.749	3616111.269	16.00
1666	604312.749	3616052.328	5.00
1667	604312.749	3615886.827	12.00
1668	604312.749	3615864.183	14.00
1669	604312.749	3615862.518	12.00
1670	604312.749	3615835.545	24.00
1671	604312.749	3615809.571	5.00
1672	604313.082	3617160.885	12.00
1673	604313.082	3617030.682	12.00
1674	604313.082	3617002.71	15.00
1675	604313.082	3616997.715	11.00
1676	604313.082	3616921.125	3.00
1677	604313.082	3616896.483	25.00
1678	604313.082	3616862.517	12.00
1679	604313.082	3616846.866	10.00
1680	604313.082	3616823.556	6.00
1681	604313.082	3616798.581	10.00
1682	604313.082	3616792.587	10.00
1683	604313.082	3616744.968	10.00
1684	604313.082	3616733.979	17.00
1685	604313.082	3616726.32	4.00
1686	604313.082	3616597.782	15.00
1687	604313.082	3616569.477	4.00
1688	604313.082	3616556.49	6.00
1689	604313.082	3616495.884	6.00
1690	604313.082	3616445.601	10.00
1691	604313.082	3616413.3	16.00
1692	604313.082	3616409.637	8.00
1693	604313.082	3616387.326	6.00
1694	604313.082	3616350.03	9.00
1695	604313.082	3616348.032	10.00
1696	604313.082	3616304.742	11.00
1697	604313.082	3616264.782	10.00
1698	604313.082	3616225.821	6.00
1699	604313.082	3616204.176	10.00
1700	604313.082	3616190.19	10.00
1701	604313.082	3616188.192	8.00
1702	604313.082	3616181.865	10.00
1703	604313.082	3616172.208	6.00
1704	604313.082	3616157.556	10.00
1705	604313.082	3616097.283	14.00
1706	604313.082	3616032.681	7.00
1707	604313.082	3615935.778	15.00
1708	604313.082	3615914.799	15.00
1709	604313.082	3615911.802	12.00
1710	604313.082	3615839.874	22.00
1711	604313.415	3617046.333	9.00
1712	604313.415	3617013.366	5.00
1713	604313.415	3616990.389	9.00
1714	604313.415	3616986.06	18.00
1715	604313.415	3616931.115	10.00
1716	604313.415	3616868.178	17.00
1717	604313.415	3616843.203	16.00
1718	604313.415	3616672.374	11.00
1719	604313.415	3616647.732	18.00
1720	604313.415	3616640.073	17.00
1721	604313.415	3616601.445	9.00
1722	604313.415	3616549.164	7.00
1723	604313.415	3616520.859	14.00
1724	604313.415	3616512.201	18.00
1725	604313.415	3616479.234	11.00
1726	604313.415	3616476.237	13.00
1727	604313.415	3616467.912	12.00
1728	604313.415	3616458.255	13.00
1729	604313.415	3616397.982	9.00
1730	604313.415	3616392.654	9.00
1731	604313.415	3616373.673	9.00
1732	604313.415	3616371.009	14.00
1733	604313.415	3616316.397	12.00
1734	604313.415	3616289.424	14.00
1735	604313.415	3616270.11	4.00
1736	604313.415	3616245.801	8.00
1737	604313.415	3616215.165	6.00
1738	604313.415	3616186.86	10.00
1739	604313.415	3616180.533	8.00
1740	604313.415	3616179.201	9.00
1741	604313.415	3616145.568	11.00
1742	604313.415	3616142.571	3.00
1743	604313.415	3616122.591	14.00
1744	604313.415	3616119.927	19.00
1745	604313.415	3616113.6	14.00
1746	604313.415	3616100.946	7.00
1747	604313.415	3616083.297	11.00
1748	604313.415	3615920.127	19.00
1749	604313.415	3615857.523	22.00
1750	604313.415	3615845.535	26.00
1751	604313.415	3615806.241	5.00
1752	604313.748	3617157.555	12.00
1753	604313.748	3617137.242	13.00
1754	604313.748	3617135.244	13.00
1755	604313.748	3617114.931	7.00
1756	604313.748	3617105.94	17.00
1757	604313.748	3617062.65	13.00
1758	604313.748	3617035.011	9.00
1759	604313.748	3617033.346	10.00
1760	604313.748	3616966.413	13.00
1761	604313.748	3616939.44	5.00
1762	604313.748	3616908.138	11.00
1763	604313.748	3616880.499	10.00
1764	604313.748	3616860.519	16.00
1765	604313.748	3616849.863	4.00
1766	604313.748	3616804.908	16.00
1767	604313.748	3616783.263	6.00
1768	604313.748	3616746.633	13.00
1769	604313.748	3616741.971	14.00
1770	604313.748	3616727.985	4.00
1771	604313.748	3616721.658	4.00
1772	604313.748	3616682.697	14.00
1773	604313.748	3616675.038	10.00
1774	604313.748	3616591.788	12.00
1775	604313.748	3616586.793	12.00
1776	604313.748	3616553.16	11.00
1777	604313.748	3616536.51	13.00
1778	604313.748	3616530.516	15.00
1779	604313.748	3616526.853	16.00
1780	604313.748	3616509.537	13.00
1781	604313.748	3616489.224	11.00
1782	604313.748	3616456.257	8.00
1783	604313.748	3616443.603	6.00
1784	604313.748	3616436.943	14.00
1785	604313.748	3616399.314	11.00
1786	604313.748	3616395.651	8.00
1787	604313.748	3616381.332	8.00
1788	604313.748	3616378.668	11.00
1789	604313.748	3616346.7	11.00
1790	604313.748	3616330.716	10.00
1791	604313.748	3616321.725	7.00
1792	604313.748	3616313.4	10.00
1793	604313.748	3616311.402	11.00
1794	604313.748	3616303.743	7.00
1795	604313.748	3616292.421	5.00
1796	604313.748	3616271.442	10.00
1797	604313.748	3616081.299	6.00
1798	604313.748	3615944.103	3.00
1799	604313.748	3615892.821	4.00
1800	604314.081	3617151.561	10.00
1801	604314.081	3617126.586	10.00
1802	604314.081	3617099.28	11.00
1803	604314.081	3617064.648	14.00
1804	604314.081	3617010.702	5.00
1805	604314.081	3616956.423	11.00
1806	604314.081	3616937.442	11.00
1807	604314.081	3616914.798	9.00
1808	604314.081	3616904.142	5.00
1809	604314.081	3616885.494	15.00
1810	604314.081	3616883.163	11.00
1811	604314.081	3616791.255	5.00
1812	604314.081	3616777.602	15.00
1813	604314.081	3616727.652	3.00
1814	604314.081	3616716.663	15.00
1815	604314.081	3616692.354	13.00
1816	604314.081	3616665.048	24.00
1817	604314.081	3616595.118	9.00
1818	604314.081	3616566.147	4.00
1819	604314.081	3616548.498	8.00
1820	604314.081	3616539.507	8.00
1821	604314.081	3616532.847	15.00
1822	604314.081	3616525.188	11.00
1823	604314.081	3616517.529	11.00
1824	604314.081	3616462.584	5.00
1825	604314.081	3616460.586	11.00
1826	604314.081	3616449.597	21.00
1827	604314.081	3616407.639	16.00
1828	604314.081	3616389.99	9.00
1829	604314.081	3616385.994	7.00
1830	604314.081	3616383.996	9.00
1831	604314.081	3616377.336	9.00
1832	604314.081	3616368.678	8.00
1833	604314.081	3616365.681	7.00
1834	604314.081	3616280.1	10.00
1835	604314.081	3616278.435	8.00
1836	604314.081	3616259.787	9.00
1837	604314.081	3616252.794	8.00
1838	604314.081	3616251.129	7.00
1839	604314.081	3616249.131	8.00
1840	604314.081	3616232.814	9.00
1841	604314.081	3616224.489	7.00
1842	604314.081	3616202.511	8.00
1843	604314.081	3616190.856	11.00
1844	604314.081	3616173.207	11.00
1845	604314.081	3616160.886	11.00
1846	604314.081	3616128.585	4.00
1847	604314.081	3616100.28	5.00
1848	604314.081	3616079.967	6.00
1849	604314.081	3615933.78	10.00
1850	604314.081	3615903.144	22.00
1851	604314.081	3615895.485	12.00
1852	604314.414	3617177.202	10.00
1853	604314.414	3617112.267	5.00
1854	604314.414	3617068.977	4.00
1855	604314.414	3617067.978	3.00
1856	604314.414	3617066.646	13.00
1857	604314.414	3617030.016	14.00
1858	604314.414	3617007.705	3.00
1859	604314.414	3616997.049	11.00
1860	604314.414	3616954.758	6.00
1861	604314.414	3616934.778	7.00
1862	604314.414	3616906.473	10.00
1863	604314.414	3616853.859	6.00
1864	604314.414	3616851.861	8.00
1865	604314.414	3616815.231	13.00
1866	604314.414	3616808.571	16.00
1867	604314.414	3616784.262	4.00
1868	604314.414	3616637.076	17.00
1869	604314.414	3616562.151	3.00
1870	604314.414	3616561.485	3.00
1871	604314.414	3616552.161	10.00
1872	604314.414	3616545.501	4.00
1873	604314.414	3616484.895	7.00
1874	604314.414	3616433.28	14.00
1875	604314.414	3616393.653	14.00
1876	604314.414	3616391.988	6.00
1877	604314.414	3616356.357	17.00
1878	604314.414	3616336.377	12.00
1879	604314.414	3616332.048	13.00
1880	604314.414	3616327.053	10.00
1881	604314.414	3616325.388	13.00
1882	604314.414	3616318.395	4.00
1883	604314.414	3616306.74	8.00
1884	604314.414	3616288.425	14.00
1885	604314.414	3616286.76	13.00
1886	604314.414	3616281.432	8.00
1887	604314.414	3616256.457	10.00
1888	604314.414	3616234.146	10.00
1889	604314.414	3616209.171	9.00
1890	604314.414	3616205.508	10.00
1891	604314.414	3616171.542	8.00
1892	604314.414	3616102.611	14.00
1893	604314.414	3616081.632	6.00
1894	604314.414	3615976.071	18.00
1895	604314.414	3615958.422	4.00
1896	604314.414	3615941.106	7.00
1897	604314.414	3615924.456	25.00
1898	604314.414	3615913.8	10.00
1899	604314.414	3615886.494	14.00
1900	604314.414	3615861.186	7.00
1901	604314.414	3615851.862	27.00
1902	604314.414	3615831.216	20.00
1903	604314.747	3617159.886	13.00
1904	604314.747	3617111.268	9.00
1905	604314.747	3617102.277	10.00
1906	604314.747	3617049.663	16.00
1907	604314.747	3617047.332	13.00
1908	604314.747	3617034.012	10.00
1909	604314.747	3617022.69	7.00
1910	604314.747	3617020.692	8.00
1911	604314.747	3617014.365	6.00
1912	604314.747	3617008.038	3.00
1913	604314.747	3617004.042	11.00
1914	604314.747	3616995.051	8.00
1915	604314.747	3616970.076	3.00
1916	604314.747	3616968.744	3.00
1917	604314.747	3616940.772	8.00
1918	604314.747	3616810.236	11.00
1919	604314.747	3616736.31	12.00
1920	604314.747	3616700.346	28.00
1921	604314.747	3616694.352	8.00
1922	604314.747	3616600.779	12.00
1923	604314.747	3616589.79	17.00
1924	604314.747	3616586.127	12.00
1925	604314.747	3616534.512	17.00
1926	604314.747	3616523.19	13.00
1927	604314.747	3616503.543	18.00
1928	604314.747	3616483.563	12.00
1929	604314.747	3616478.568	12.00
1930	604314.747	3616454.592	10.00
1931	604314.747	3616435.944	14.00
1932	604314.747	3616374.006	13.00
1933	604314.747	3616352.694	18.00
1934	604314.747	3616346.034	9.00
1935	604314.747	3616343.37	16.00
1936	604314.747	3616312.068	9.00
1937	604314.747	3616260.786	7.00
1938	604314.747	3616222.491	4.00
1939	604314.747	3616207.506	10.00
1940	604314.747	3616199.514	7.00
1941	604314.747	3616147.899	20.00
1942	604314.747	3615982.065	25.00
1943	604314.747	3615967.08	11.00
1944	604314.747	3615937.11	9.00
1945	604314.747	3615906.141	18.00
1946	604314.747	3615810.237	3.00
1947	604315.08	3617178.201	12.00
1948	604315.08	3617156.556	12.00
1949	604315.08	3617090.955	13.00
1950	604315.08	3617010.036	8.00
1951	604315.08	3616970.409	3.00
1952	604315.08	3616929.117	4.00
1953	604315.08	3616854.858	5.00
1954	604315.08	3616799.247	12.00
1955	604315.08	3616785.594	5.00
1956	604315.08	3616745.301	17.00
1957	604315.08	3616740.972	16.00
1958	604315.08	3616713.333	20.00
1959	604315.08	3616708.338	9.00
1960	604315.08	3616687.692	28.00
1961	604315.08	3616669.71	14.00
1962	604315.08	3616470.909	10.00
1963	604315.08	3616461.918	8.00
1964	604315.08	3616334.379	11.00
1965	604315.08	3616296.084	5.00
1966	604315.08	3616277.436	8.00
1967	604315.08	3616258.455	11.00
1968	604315.08	3616248.465	7.00
1969	604315.08	3616231.149	9.00
1970	604315.08	3616229.484	8.00
1971	604315.08	3616211.169	9.00
1972	604315.08	3616189.857	6.00
1973	604315.08	3616152.561	9.00
1974	604315.08	3616104.609	17.00
1975	604315.08	3616071.309	13.00
1976	604315.08	3616064.982	27.00
1977	604315.08	3616061.652	25.00
1978	604315.08	3615950.43	9.00
1979	604315.08	3615930.45	15.00
1980	604315.08	3615873.507	21.00
1981	604315.08	3615836.877	25.00
1982	604315.08	3615808.572	6.00
1983	604315.08	3615806.241	3.00
1984	604315.413	3617167.212	3.00
1985	604315.413	3617163.216	12.00
1986	604315.413	3617134.245	13.00
1987	604315.413	3617089.29	11.00
1988	604315.413	3616947.765	6.00
1989	604315.413	3616870.842	14.00
1990	604315.413	3616865.514	11.00
1991	604315.413	3616852.527	8.00
1992	604315.413	3616804.242	12.00
1993	604315.413	3616788.258	3.00
1994	604315.413	3616775.604	9.00
1995	604315.413	3616555.158	9.00
1996	604315.413	3616531.182	10.00
1997	604315.413	3616513.866	18.00
1998	604315.413	3616508.205	16.00
[truncated: 114,007 more rows]
